# Supplementary material for: TFIIS-Dependent Non-coding Transcription Regulates Developmental Genome Rearrangements
Source: PubMed Central journal article supplement (PMC4503560; doi:10.1371/journal.pgen.1005383), 2015-07-15
Supplement: pgen.1005383.s001.pdf [file pgen.1005383.s001.pdf]

Domain II

|                |     |                                                        |                                                  |                                      |                            |                    |                 |
|----------------|-----|--------------------------------------------------------|--------------------------------------------------|--------------------------------------|----------------------------|--------------------|-----------------|
| Pt_TFIIS1a     | 132 | PSYVD--RVKYNA--SNLFILNIQKFK--NQ--NDLN--ASD             | RQTIK--CVEKMENTIYH--KRQDDY                       | FRKAMEODLRIILAGFLK--KDKN             | GSLTYSFTKQFT               | FINAAQLRAADWVD     |                 |
| Pt_TFIIS1c     | 132 | PAYAD--RIKYKGI--NQMFIANIFTFK--KD--NVLN--DSE            | YQTIK--CVEKMENTIYH--KRQDDY                       | FRKAMEODLRIILAGFLK--KDKN             | GSLTYRIFTKAFI              | EVSAQLRAADWVD      |                 |
| Pt_TFIIS2a     | 114 | TGYVD--RIQNLN--SNL--LHIFKNWN--QS--NKEQ--LIS            | IDKVKVETIG--EKEIYML--RNFVKDS                     | SKKLAMEMDIKTILOQEMK--RDKS            | GDVLRVFNKSL                | SYQAAQLKSEWID      |                 |
| Pt_TFIIS2b     | 114 | TGYVD--RIQNLN--SNL--LHIFKNWD--QT--NKEQ--LIS            | IDKIKAVTIG--EKEIYML--RNFYKDS                     | FRKMTYEMDIKTILOQEMK--RDKI            | GDVLRVFNKSL                | SYEQAAQLKSEWID     |                 |
| Pt_TFIIS3      | 128 | PQNFDPTRIKVLOT-----LIQKFT                              | NE-T-----TPH                                     | QES--IKFCKK--EKEIYML--RFL            | NKE--ROMQTAIREIILKYLO--NDR | GSVNRNMSGLV        | DIPTAAQLRSEWITS |
| Pt_TFIIS4      | 137 | --DQFDK--IRAKLSEYLQKQLQQ-----KQ--QQDLFQ                | E--ENLVDKCNK--LADALENNIY--N--RHYQT               | VAPG--KNYSSDLKTILOQYVIG--KDKS        | GRVLHKLFE                  | GFFIVNQACQLQLKDWLD |                 |
| Tt_TFIIS       | 147 | PTYKSDIRQKGLHEATNKIFMK-----VK--DDINASP                 | -----REWIETIIVNLEKKTIS--RN-----                  | SQVVYKSYTREVILGMFSSNEVTTETVISKMINKET | SLQDVAEAKT                 | SVFLT              |                 |
| Ot_22233_0_g55 | 170 | TQYRDSLRINFTKYMQIPE-----EGV--EY--E-E--IVLTRAAOGLIQTEDL | YK--SF-----                                      | PRLAEYONKARSLMFLNK--DKNPDLRMSL       | EGVITL                     | FNQLVRDLSKSLAS     |                 |
| Ot_1015_0_g5   | 340 | MTYRDQRRRLVNIIMRDSMKQIVYPNSKAQLTDGE--KN--WAT           | CGLRTEQDQNV--SY-----                             | SQVKTYSDKARSLFLNLS--DSKNFELRFKILNQEL | SAQQLVHTDVKKLAS            |                    |                 |
| Ot_14486_0_g34 | 340 | MTYRDQRRRLVNIIMRDSMKQIVYPNSKAQLTDGE--KN--WAT           | CGLRTEQDQNV--SY-----                             | SQVKTYSDKARSLFLNLS--DSKNFELRFKILNQEL | SAQQLVHTDVKKLAS            |                    |                 |
| Mc_conN1       | 164 | NETEDKVRNGIRKGLKLLCK-----SN-----EN--PK-----            | KCKA--SIK--ENSIVL--RLG---                        | HLKEYTNKCRSITANLQ--R--SDE            | FRSKIINGIFTHDDL            | AAMNPRDFLE         |                 |
| Im_IMG5_116810 | 13  | -----VRNKGLQAL-----FMK-----FK--E-CDQDK                 | -----ADIVKISVNIIEKIAH--KN-----                   | SQVEVYKKNIREVILGMLSNYQVIOEVLKGI      | IQEKT                      | SIKDVAECKSVFML     |                 |
| Lm_TFIIS1-1    | 167 | AAKRITLHQRWAAALHGVLMK-----ER--PS--S--E--SERVMELCVRI    | VEST-----P--GDMEQQTDFQILLFNK--DSKN               | GLRKRKVVGEVIVL                       | VERLVTMDDLELAN             |                    |                 |
| Lm_TFIIS2-1    | 257 | PTQRKTFYDNVYQLDSPLST-----T--R-----Y--DDTVI--DE         | VARRL-----T--AEI--TD--DEROMLLRLR--EELS           | FRDHLISGEWIFPKKYLDQPS                | EVFTT                      |                    |                 |
| Tb_TFIIS1      | 52  | D-----TRLTKWTKILLCKALMQ-----GR--KE--E--D--EGRVADMA     | IRVKA-----P--GGRSEADTF                           | RMILLVHLG--DAKNR                     | ELRESTIEEK                 | SVVEIVRMKERDILLN   |                 |
| Tb_TFIIS2-1    | 254 | GGAQPQFVDRVQKLL--QP-----GD--PH--S--F--SVRSSDLR--SVA    | EKI-----C--AETV--RSEDRMYLLEHLS--KPL              | SEIRRLAMGEL                          | SGKDFLELSRWELMT            |                    |                 |
| Hs_TCEA1       | 134 | PSTSDSVRIKCREMLAAALRF-----GD--DY--I--AAI--GADDEEL      | LGSOIEEAIYQ--EIR--NTDMKYKNRVRSRISNLK--DAKNP      | DLRRNVLCGAT                          | IPQQLAVMTSEEMAS            |                    |                 |
| Hs_TCEA2       | 132 | PVTCDAVRNKCREMLTAAALQT---DH--DH--V---AI--GADCE         | RLSAQIEECTIR--DVG---NTDMKYKNRVRSRISNLK--DAKNP    | DLRRNVLCGAT                          | IPQQLAVMTSEEMAS            |                    |                 |
| Hs_TCEA3       | 181 | YLTGDSVRDKVEMLSAALKA---DD--DY--K---DY--GVNCDK          | MASEIEDHIYQ--ELK---STDMKYKNRVRSRISNLK--DPENP     | GLRRNVLSGAI                          | SAGLAKMTAEEMAS             |                    |                 |
| At_TFIIS       | 204 | LKCNPDVRDKIRELLVEALCRVAGEAD--DY--E--RESVNASDPLRV       | AVSVESLMFE--RLG---RSTGAOKLKYRSIMFNLR--DSNPD      | LRNRVLTGEI                           | SPEKILTSAEDMAS             |                    |                 |
| Ce_TFIIS       | 142 | HLENDETRIKSAQILLALRF---GD--MP--Q---G--TLDPEL           | LAVQIEEKLYS--VHR--DTNKSSAAVRSRIFNLR--DKNL        | LALRENVI                             | GTGVRAEKFTMTSEEMAS         |                    |                 |
| Dm_TFIIS       | 147 | GGMTDAVRIKCREMLATALKI---GE--VP--E--G--CGEPE            | EMAABEDAIYS--EFN---NTDMKYKNRVRSRIVANLK--DPKNP    | GLRGNMCGAV                           | TAKQLAKMTPEEMAS            |                    |                 |
| Dm_CG8117      | 6   | -----RIKCREMLATALKS---GN--MP--P---G--CGDPD             | MAAKLEDAIYG--DLN---GCKVKYKNRVRSRLANLR--DPKNP     | ELRQKFI                              | LLGQITPEELSKMTPEEMAS       |                    |                 |
| Sp_tfs1        | 127 | NVTDDKTRNNTGLMNYALV---IDS--DE--S--S---SLII             | AKAKETDAQVLA--RAAG---KTGSEYRNRNMSLYMNLK--DKNNP   | KLRASV                               | LRNEITPQRLSTMTSAELAS       |                    |                 |
| Sc_Dst1        | 142 | AIYHHKLRDQVLEKALYDVLA---KES--EH--P-P-----              | QSLHTAKALESEMKNVNNCD---INEAAYKARYRTIYSNVI--SKNNP | DLKHKLI                              | ANGDITPEFLATCDADLAP        |                    |                 |

α1

α2

α3

α4

α5

α6

Linker & Domain III

|                |     |                                      |                                                      |
|----------------|-----|--------------------------------------|------------------------------------------------------|
| Pt_TFIIS1a     | 238 | DETKQEQSRIIEKKEAEQIGYKDSK--REMEGV    | GKTKGCGQKQVYLVDEKQTRASDEPTIKFEFCYNGD--KFRIC          |
| Pt_TFIIS1c     | 238 | DETKQEQARIIEKKEAEQIGYKDSK--REMEGI    | GKTKGCGQKQVYLVDEKQTRASDEPTIKFEFCYNGD--KFRIC          |
| Pt_TFIIS2a     | 220 | EKTKLNLQKAAQKEELEINQIGYKESK--REMDGV  | GKCGHQKQVYLVVEKQTRCADEPTIKFEFCFNCGD--KFR-I           |
| Pt_TFIIS2b     | 220 | EKTKLNLQQAQKEELEINQIGYKESK--REMDGV   | GKCGHQKQVYLVVEKQTRCADEPTIKFEFCFNCGD--KFR-V           |
| Pt_TFIIS3      | 222 | ATRLAIGGVGSEIISANLMMHNYKLIQ--AINKDVA | GLONNGQKQKLVNIEQTRASDEPSTKEVEICNIGIGETNG             |
| Pt_TFIIS4      | 241 | BEVIRELENRKISEKDDADYRQIRI--KEMIQ     | SKGQCEPCHNNYLYIIEETKQIRRADEPATIEYECFAQH--RMK-V       |
| Tt_TFIIS       | 245 | DRORAQQKAVEDQLATSDPDYNNMR--QRLOGL    | EGELGKCGKKTAFVLKELQTRSSDEPMTRFMECNSGK--SWK-D         |
| Ot_22233_0_g55 | 266 | KALQDEBENKTOQANLNARRSDMFIENAA--KKG   | NKGFETCKKCHSNTTY--FOMQTRGADBPMTNFITCLDCKN--QWK-C     |
| Ot_1015_0_g5   | 444 | EWKQKREESLRTL SMKRTDMDVQETL--SQGE    | FQGMFQCE--CGSOKTGY--IQQLERADEPMTNFVYCYDCEN--RWK-C    |
| Ot_14486_0_g34 | 444 | EWKQKREESLRTL SMKRTDMDVQETL--SQGE    | FQGMFQCE--CGSOKTGY--IQQLERADEPMTNFVYCYDCEN--RWK-C    |
| Mc_conN1       | 256 | DSLKKKRAKRETRIDSKRS---DY--LA--NSKI   | KEGMYTCEKCKSKKTFE--YEQQTRSADEPMTTFVQCLMOSH--NMK-F    |
| Im_IMG5_116810 | 101 | QKEKEENLQQLQTEFEVLDPEYNKRR--KNLV     | GLGEGKCRNCKKLTAFVLKELQTRAADEPMTRFMECNSGK--KWK-E      |
| Lm_TFIIS1-1    | 259 | PELRKHIEEKIEERSKDTNL---SE--RKAM      | TRTNSLTFKCRVCGARDSSW--EQRQTRSGDEPMTVITCNKONT--QWRKY  |
| Lm_TFIIS2-1    | 342 | KSEKARQQRQEKKAIEA---A--DNAM          | NLNITSLFKGRCGKRHCTE--YEQQTRSADEPMTTKYITCLDCKN--TWTQE |
| Tb_TFIIS1      | 140 | PEERERQEAFLARSRDIDL---TE--RK--ATS    | ITSTLFPSPCKARNCTW--TQKQTRSADEPMTIEFCINICEH--KWRRY    |
| Tb_TFIIS2-1    | 341 | QBEKEDAEERTTEKLRNLE---ETER--SL       | LHTTSLFECPECHGRECEM--RELQTRSADEPMTTKFKCIKCKH--NWSEN  |
| Hs_TCEA1       | 231 | DELKEMRKNLTKAEAREH---QMAK--TGG       | TQTDLETCGCKKKNCTY--TQVQTRSADEPMTTFVVCNCGN--RWKFC     |
| Hs_TCEA2       | 229 | DELKEIRKAMTKAEAREH---QMAK--TGG       | TQTDLETCGCKKKNCTY--TQVQTRSSDEPMTTFVVCNCGN--RWKFC     |
| Hs_TCEA3       | 278 | DELRELFNAMTQAEAREH---QMAK--TGG       | ITDLEFQCSKCKKNCTY--NOVQTRSADEPMTTFVLCNCGN--RWKFC     |
| At_TFIIS       | 308 | DKRKQENNOIKEALFDC---ERGL--AAK        | ASTDQFKGRCGQRKCTY--YQMQTRSADEPMTTVVTVNCDN--HWKFC     |
| Ce_TFIIS       | 238 | AEIREMRDKFTKAEAREH---QMSV--QGT       | PSDMFKCGKCGKNCTY--TQLQTRSSDEPMTTFVFCLECGN--RWKFC     |
| Dm_TFIIS       | 243 | DEMKKLREKFKVKEAINDA---QLAT--VQ       | GTKTDLKCAKCKKNCTY--NQLQTRSADEPMTTFVMONCGN--RWKFC     |
| Dm_CG8117      | 95  | DDMKQMRQKYQDSINAA---QMAK--VQ         | GKTKTQFKCEKDKNCS---QLHITDGDPEITITFVICDECGN--RWK-S    |
| Sp_tfs1        | 223 | EDRRKEDAKLEQENLFHA---QGAK--PQ        | AVTDLETCGCKQKQKVSY--YQMQTRSADEPMTTFCECTVCGN--RWKFS   |
| Sc_Dst1        | 239 | APLKQKLEIAKONLYNA---QAT--IER         | SVTRFETCGCKQKQKVSY--YQLQTRSADEPMTTFCTCEAGN--RWKFS    |

α7

β1

DE

β2

β3
