# Supplementary material for: TFIIS-Dependent Non-coding Transcription Regulates Developmental Genome Rearrangements
Source: PubMed Central journal article supplement (PMC4503560; doi:10.1371/journal.pgen.1005383), 2015-07-15
Supplement: pgen.1005383.s012.pdf [file pgen.1005383.s012.pdf]

**Table S1. Coordinates of sequences used in this study as northern probes, inserts in GFP constructs and silencing constructs.**

| Gene Name      | Gene ID           | Acc. No. of scaffold | Coordinates of ORF | Coordinates of northern probe | Coordinates of fragment used for GFP-fusion construct | Coordinates of silencing insert |
|----------------|-------------------|----------------------|--------------------|-------------------------------|-------------------------------------------------------|---------------------------------|
| <i>TFIIS1a</i> | GSPATG00003556001 | NW_001799630.1       | 272378..271880     | 272378..271880                | 272523..271301                                        | 272378..271411                  |
| <i>TFIIS1c</i> | GSPATG00008714001 | NW_001799089.1       | 221560..222075     | 221560..222075                | 221309..222760                                        | 221560..222531                  |
| <i>TFIIS2a</i> | PTETG1100023001   | NW_001798967.1       | 586182..585733     | 586239..586288                | 586383..585380                                        | 586306..585416                  |
| <i>TFIIS2b</i> | GSPATG00003298001 | NW_001799619.1       | 624195..623735     | 624285..624334                | 624448..623339                                        | 624352..623462                  |
| <i>TFIIS3</i>  | GSPATG00019582001 | NW_001799522.1       | 172955..172457     | 172955..172457                | 173114..171918                                        | 172955..171979                  |
| <i>TFIIS4</i>  | GSPATG00025792001 | NW_001799642.1       | 151716..150602     | 150602..150859                | 151832..150423                                        | 150860..151702                  |
