# Supplementary material for: TFIIS-Dependent Non-coding Transcription Regulates Developmental Genome Rearrangements
Source: PubMed Central journal article supplement (PMC4503560; doi:10.1371/journal.pgen.1005383), 2015-07-15
Supplement: pgen.1005383.s013.pdf [file pgen.1005383.s013.pdf]

**Table S2. Oligonucleotides used in the study.**

| Oligo name    | Sequence (5' to 3')               | Application                                   |
|---------------|-----------------------------------|-----------------------------------------------|
| 51A2591-18    | AAGTGCAACCTGTGCTGATGCTCCCGATGA    | PCR around IES 51A2591                        |
| 51A2591-20    | AGTTCCTTTGAAAGATGTGCAAGCTCCAGA    | PCR around IES 51A2591                        |
| 51A4578-3'    | TGTAGTCTTAAAATCTTAGCATGTTGTACC    | PCR around IES 51A4578                        |
| 51A4578-5'    | CACTGCAGTAAGTTGCAGTTCAATAACTGG    | PCR around IES 51A4578                        |
| 51A1835-5'    | TAATGTATTGATAAGGCTTGCTCTACAGCC    | PCR around IES 51A1835                        |
| 51A1835-3'(3) | GTAGTACAAGATTTTTTCGACACAAGTTGAG   | PCR around IES 51A1835                        |
| 51A4404-3'(2) | CCAGTTATTGAACTGCAACTTACTGCAGTG    | PCR around IES 51A4404                        |
| 51A4404-5'    | TAAATGTTTCAGCTTACAACGCAGCT        | PCR around IES 51A4404                        |
| 51G2832 up    | GAGCAGGATGTACAAATACTGGTGG         | PCR around IES 51G2832                        |
| 51G2832 lo    | AGCTGATTAGATAACAATACAACCAGTACC    | PCR around IES 51G2832                        |
| 51G18         | ACTGTTGCTACACATTGTGCATATGTTACT    | PCR around IES 51G4404                        |
| 51G19         | GCTGTAAGATTAACATTGAGCATGATCAAG    | PCR around IES 51G4404                        |
| 51A6649-12(2) | ACTGCACCTCTAACTTTAACAAGCGAAGCA    | PCR around IES 51A6649                        |
| 51A6649-3'    | CAGCAGTACATCCAGCTCTCTAAGTTTAGC    | PCR around IES 51A6649                        |
| 51A-712-10    | TTTGTCAAAAAGACATGTATCAAAATGCAG    | PCR around IES 51A-712                        |
| 51A-712-11    | TAGAATACTAAGAGATTCAATACAACAAAC    | PCR around IES 51A-712                        |
| 51G1832 up    | GCTATAACTCTTGAAGCTGCTTGTAATATG    | PCR around IES 51G1832                        |
| 51G1832 lo    | TTGTCAATGAGCCATTAACAGTTGCTGGAT    | PCR around IES 51G1832                        |
| sm19-1        | CTAAGAAAATGAGCAAATAGTGGAAATAAAT   | PCR around IES sm19-576                       |
| sm19-4        | GACAAGATCCTATATATTCATTTACATTTG    | PCR around IES sm19-576                       |
| 51A6435-5'(2) | TTCCAAGCCTTAGTCAATCAATCAGGATGTGTC | PCR around IES 51A6435                        |
| 51A6435-3'(2) | TTTGTGAAATAACTAGCACAAGCTGCTTCG    | PCR around IES 51A6435                        |
| PBI49-01      | TAGAGGCATTGGAGCAGTGGGAAGTATTAG    | <i>PGM</i> hybridization probe                |
| PBI49-02      | AAGTTTCTCTAAGAAATTTGGCTTGATGG     | <i>PGM</i> hybridization probe                |
| mit1          | GGGGGCGGGCGGGCTCAAGTGCTGC         | mitochondrial probe                           |
| mit2          | TAGGCCGTCGTCCTTAAAGAAGGAGT        | mitochondrial probe                           |
| 51G18         | ACTGTTGCTACACATTGTGCATATGTTACT    | PCR for detection of maternal transcripts     |
| 51G17         | GATCAAGTCCAGTTCCTGTTATAGAACTAC    | PCR for detection of maternal transcripts     |
| 51G15         | TTAATGCTCATTTCATCCAAATTAGCCTTTG   | PCR for IES+ 51G4404 probe                    |
| 51G06         | CAGCCGGTATTATTAAGTAACTTTAAAAG     | PCR for IES+ 51G4404 probe/IES+ transcripts   |
| 51G05         | GATGGTATTATAAATCGAATATTAATTCTG    | PCR for detection of IES+ 51G4404 transcripts |
| 51A6649-05    | GCAAAACTCAAGACATTGTAGTTAATTTCC    | PCR for IES+ 51A6649 probe                    |
| 51A6649-02    | ACAGGTAAAAAAATTTTTTCTATTTTC       | PCR for IES+ 51A6649 probe/IES+ transcripts   |
| 51A6649-13    | TAATCATACTCCTAGATTAGAAG           | PCR for detection of IES+ 51A6649 transcripts |
| 51A4404pl     | AAGTAATATATTTTTTAAAATATTTGGTTT    | PCR for IES+ 51A4404probe                     |

|           |                                 |                                                  |
|-----------|---------------------------------|--------------------------------------------------|
| 51A4404B  | AGTATGGTAGGTTTAAGTTTTTTTTATG    | PCR for IES+<br>51A4404probe/IES+<br>transcripts |
| 51A4404-A | ATTGTGGTGTTATTTTAAAAAGTAATATATT | PCR for detection of IES+<br>51A4404 transcripts |
| T1b-3'    | TTGAGTTGGGATTTGACATAATCGGTGAA   | PCR for detection of<br>mRNA of T1-b gene        |
| T1b-5'(2) | TCTAATTAAACCAAGAACACGCTGAATTCC  | PCR for detection of<br>mRNA of T1-b gene        |
