# Supplementary material for: TFIIS-Dependent Non-coding Transcription Regulates Developmental Genome Rearrangements
Source: PubMed Central journal article supplement (PMC4503560; doi:10.1371/journal.pgen.1005383), 2015-07-15
Supplement: pgen.1005383.s014.pdf [file pgen.1005383.s014.pdf]

**Table S3. Sequence complexity of control, PGM and TFIS4 datasets.**

| Reference       | PGM                     | TFIS4                  | Control                |
|-----------------|-------------------------|------------------------|------------------------|
| PGM             | 88 996 911 bp<br>100.0% | 84 382 513 bp<br>94.8% | 76 088 297 bp<br>85.5% |
| PGM not Control | 12 908 614 bp<br>100.0% | 8 332 941 bp<br>64.5%  | 0<br>0.0%              |
